# Supplementary material for: NaMoO3(IO3)(H2O): water molecule introduction induces strong second harmonic generation response, widened band gap and large anisotropy
Source: Royal Society of Chemistry journal article supplement (doi:10.1039/d3dt03304j), 2023-12-06
Supplement: d3dt03304j1.pdf [file d3dt03304j1.pdf]

## **Supporting Information**

**NaMoO<sub>3</sub>(IO<sub>3</sub>)(H<sub>2</sub>O): Water Molecule Introduction Induces  
Strong Second Harmonic Generation Response, Widened  
Band Gap and Large Anisotropy.**

## Contents

|                                                                                                                                                                                                                                                                                       |    |
|---------------------------------------------------------------------------------------------------------------------------------------------------------------------------------------------------------------------------------------------------------------------------------------|----|
| Table S1. Atomic coordinates ( $\times 10^4$ ), equivalent isotropic displacement parameters ( $\text{\AA}^2 \times 10^3$ ) and BVS for $\text{NaMoO}_3(\text{IO}_3)(\text{H}_2\text{O})$ .....                                                                                       | 3  |
| Table S2. Bond lengths ( $\text{\AA}$ ) for $\text{NaMoO}_3(\text{IO}_3)(\text{H}_2\text{O})$ .....                                                                                                                                                                                   | 4  |
| Table S3. Band gap and birefringence data for some representative inorganic oxide optical crystals.....                                                                                                                                                                               | 5  |
| Table S4. The calculated dipole moments of anionic groups within a unit cell of $\text{NaMoO}_3(\text{IO}_3)(\text{H}_2\text{O})$ . ....                                                                                                                                              | 6  |
| Table S5. Calculated SHG coefficients of $\text{NaMoO}_3(\text{IO}_3)(\text{H}_2\text{O})$ .....                                                                                                                                                                                      | 7  |
| Figure S1. The calculated (Dark Cyan) and experimental (The colors orange and LT Magenta represent fresh samples and samples exposed to humid air for more than 3 months, respectively) powder X-ray diffraction patterns of $\text{NaMoO}_3(\text{IO}_3)(\text{H}_2\text{O})$ . .... | 8  |
| Figure S2. EDS analysis of $\text{NaMoO}_3(\text{IO}_3)(\text{H}_2\text{O})$ .....                                                                                                                                                                                                    | 8  |
| Figure S3. The coordination environment of Na atoms in the structure of $\text{NaMoO}_3(\text{IO}_3)(\text{H}_2\text{O})$ .....                                                                                                                                                       | 9  |
| Figure S4. The Na-O line consisted by $[\text{Na}(1)\text{O}_7]$ polyhedra.....                                                                                                                                                                                                       | 9  |
| Figure S5. The connection mode of $[\text{MoO}_6]$ octahedra and $[\text{IO}_3]$ pyramids within the structures of $\text{AMoO}_3(\text{IO}_3)$ ( $\text{A} = \text{NH}_4^+$ and alkali-metal ions) family.....                                                                       | 9  |
| Figure S6. The comparison of layer orientation and distance within the structures of $\text{NaMoO}_3(\text{IO}_3)(\text{H}_2\text{O})$ and $\alpha\text{-KMoO}_3(\text{IO}_3)$ .....                                                                                                  | 10 |
| Figure S7. The degree of torsion for adjacent $[\text{MoO}_6]$ octahedron in Mo-O chain for $\text{NaMoO}_3(\text{IO}_3)(\text{H}_2\text{O})$ and $\alpha\text{-KMoO}_3(\text{IO}_3)$ .....                                                                                           | 10 |
| Figure S8. The different dihedral angle between two $[\text{IO}_3]$ groups in $\text{NaMoO}_3(\text{IO}_3)(\text{H}_2\text{O})$ and $\alpha\text{-KMoO}_3(\text{IO}_3)$ . ....                                                                                                        | 10 |
| Figure S9. Infrared spectrum of $\text{NaMoO}_3(\text{IO}_3)(\text{H}_2\text{O})$ .....                                                                                                                                                                                               | 11 |
| Figure S10. TG and DSC curves of $\text{NaMoO}_3(\text{IO}_3)(\text{H}_2\text{O})$ .....                                                                                                                                                                                              | 11 |
| Figure S11. The powder X-ray diffraction patterns of the intermediate after calcination at 300 °C of $\text{NaMoO}_3(\text{IO}_3)(\text{H}_2\text{O})$ . ....                                                                                                                         | 12 |
| Figure S12. The powder X-ray diffraction patterns of the residue after calcination at 600 °C of $\text{NaMoO}_3(\text{IO}_3)(\text{H}_2\text{O})$ . ....                                                                                                                              | 12 |

Table S1. Atomic coordinates ( $\times 10^4$ ), equivalent isotropic displacement parameters ( $\text{\AA}^2 \times 10^3$ ) and BVS for  $\text{NaMoO}_3(\text{IO}_3)(\text{H}_2\text{O})$ .

|       | x        | y         | z        | U(eq) | BVS  |
|-------|----------|-----------|----------|-------|------|
| I(1)  | 5189(2)  | 2668(3)   | 3298(2)  | 12(1) | 5.00 |
| I(2)  | 4794(2)  | 7669(3)   | 3198(2)  | 12(1) | 5.38 |
| Mo(1) | 7678(3)  | 4999(3)   | 5652(4)  | 7(1)  | 6.14 |
| Mo(2) | 2306(3)  | 9980(3)   | 4339(4)  | 7(1)  | 6.18 |
| Na(1) | 7505(15) | -190(30)  | 6000(20) | 47(6) | 0.98 |
| Na(2) | 2479(16) | 4690(30)  | 4690(20) | 41(5) | 1.01 |
| O(1)  | 8870(20) | 30(30)    | 3740(40) | 23(6) | -    |
| O(2)  | 1120(20) | 4940(30)  | 6840(40) | 27(6) | -    |
| O(3)  | 5990(30) | 600(40)   | 3420(30) | 28(7) | 1.93 |
| O(4)  | 3830(20) | 2110(30)  | 4200(30) | 20(5) | 2.28 |
| O(5)  | 5960(20) | 3420(30)  | 5600(30) | 17(5) | 2.27 |
| O(6)  | 8630(20) | 3320(30)  | 6260(30) | 22(5) | 1.86 |
| O(7)  | 7240(20) | 5620(30)  | 8050(30) | 15(5) | 1.82 |
| O(8)  | 8700(20) | 6610(30)  | 5580(40) | 32(6) | 1.88 |
| O(9)  | 6110(20) | 7120(30)  | 4680(40) | 27(6) | 2.58 |
| O(10) | 3980(30) | 5640(30)  | 2870(40) | 31(7) | 2.01 |
| O(11) | 4020(20) | 8420(30)  | 5150(30) | 21(5) | 1.88 |
| O(12) | 1360(20) | 8290(30)  | 4480(30) | 24(6) | 1.85 |
| O(13) | 1280(20) | 11600(30) | 3780(40) | 28(6) | 1.86 |
| O(14) | 2760(20) | 9460(30)  | 1940(30) | 12(5) | 1.88 |

Table S2. Bond lengths (Å) for NaMoO<sub>3</sub>(IO<sub>3</sub>)(H<sub>2</sub>O)

| bond         | length  | bond          | length  |
|--------------|---------|---------------|---------|
| I(1)-O(3)    | 1.83(3) | Na(1)-O(1)    | 2.40(3) |
| I(1)-O(4)    | 1.77(2) | Na(1)-O(1)#5  | 2.30(3) |
| I(1)-O(5)    | 1.84(2) | Na(1)-O(3)#5  | 2.62(3) |
| I(2)-O(9)    | 1.70(3) | Na(1)-O(3)    | 2.37(3) |
| I(2)-O(10)   | 1.81(3) | Na(1)-O(6)    | 2.99(3) |
| I(2)-O(11)   | 1.86(2) | Na(1)-O(8)#6  | 2.85(3) |
| Mo(1)-O(5)   | 2.24(2) | Na(1)-O(9)#6  | 2.68(3) |
| Mo(1)-O(6)   | 1.68(3) | Na(2)-O(2)#1  | 2.36(3) |
| Mo(1)-O(7)   | 1.95(2) | Na(2)-O(2)    | 2.33(3) |
| Mo(1)-O(7)#1 | 1.94(2) | Na(2)-O(4)    | 2.56(3) |
| Mo(1)-O(8)   | 1.68(3) | Na(2)-O(10)#7 | 2.62(3) |
| Mo(1)-O(9)   | 2.40(2) | Na(2)-O(10)   | 2.39(4) |
| Mo(2)-O(4)#2 | 2.36(2) | Na(2)-O(13)#6 | 2.77(3) |
| Mo(2)-O(11)  | 2.23(2) | O(1)-H(1A)    | 0.97    |
| Mo(2)-O(12)  | 1.68(2) | O(1)-H(1B)    | 0.97    |
| Mo(2)-O(13)  | 1.69(2) | O(2)-H(2A)    | 0.97    |
| Mo(2)-O(14)  | 1.93(2) | O(2)-H(2B)    | 0.97    |

Symmetry transformations used to generate equivalent atoms: #1  $x, -y+1, z-1/2$  #2  $x, y+1, z$  #5  
 $x, -y, z+1/2$  #6  $x, y-1, z$  #7  $x, -y+1, z+1/2$

Table S3. Band gap and birefringence data for some representative inorganic oxide optical crystals.

|                                                         | Crystal                                                                                                           | Band                     |                                           | Ref.                         |
|---------------------------------------------------------|-------------------------------------------------------------------------------------------------------------------|--------------------------|-------------------------------------------|------------------------------|
|                                                         |                                                                                                                   | gap<br>(eV)              | Birefringence                             |                              |
|                                                         | $\text{NH}_4\text{MoO}_3(\text{IO}_3)$                                                                            | 3.26                     | 0.083 @1064 nm <sup>cal</sup>             | 1                            |
|                                                         | $\gamma\text{-KMoO}_3(\text{IO}_3)$                                                                               | 3.30                     | 0.087 @1064 nm <sup>cal</sup>             | 2                            |
|                                                         | $\text{KRb}[(\text{MoO}_3)_2(\text{IO}_3)_2]$                                                                     | 3.32                     | 0.146 @1064 nm <sup>cal</sup>             | 1                            |
| Alkali metal<br>molybdenum<br>iodate family<br>crystals | $\text{LiMoO}_3(\text{IO}_3)$                                                                                     | 2.80                     | 0.178 @1064 nm <sup>cal</sup>             | 3                            |
|                                                         | $\text{Cs}_2\text{MoO}_2\text{F}_3(\text{IO}_2\text{F}_2)$                                                        | 3.31                     | 0.204 @1064 nm <sup>cal</sup>             | 4                            |
|                                                         | $\text{NaMoO}_3(\text{IO}_3)$                                                                                     | 3.19                     | 0.208 @1064 nm <sup>cal</sup>             | 2                            |
|                                                         | $\text{Rb}_2\text{MoO}_2\text{F}_3(\text{IO}_2\text{F}_2)$                                                        | 3.33                     | 0.217 @1064 nm <sup>cal</sup>             | 4                            |
|                                                         | $\text{AMoO}_3(\text{IO}_3)$ (A= K, Rb, Cs)                                                                       | 3.10                     | -                                         | 5                            |
|                                                         | $\delta\text{-KMoO}_3(\text{IO}_3)$                                                                               | 3.34                     | -                                         | 6                            |
|                                                         | A few<br>commercial<br>crystals                                                                                   | $\text{BaB}_2\text{O}_4$ |                                           | 0.122 @532 nm <sup>exp</sup> |
| $\text{YVO}_4$                                          |                                                                                                                   |                          | 0.204 @532 nm <sup>exp</sup>              | 8                            |
| $\text{CaCO}_3$                                         |                                                                                                                   |                          | 0.172 @532 nm <sup>exp</sup>              | 9                            |
| $\epsilon\text{-La}(\text{IO}_3)_3$                     |                                                                                                                   |                          | 0.0295 @visible light <sup>exp</sup>      | 10                           |
| A few iodate<br>crystals                                | $\text{K}_2\text{Zn}(\text{IO}_3)_3(\text{I}_2\text{O}_5(\text{OH}))(\text{IO}_2(\text{OH}))(\text{H}_2\text{O})$ |                          | 0.054 @visible light <sup>exp</sup>       | 11                           |
|                                                         | $\text{Ce}(\text{IO}_3)_4$                                                                                        |                          | 0.052 @546 nm <sup>exp</sup>              | 12                           |
|                                                         | $\text{CeF}_2(\text{IO}_3)_2$                                                                                     |                          | 0.212 @546nm <sup>exp</sup>               | 12                           |
| <b>This work</b>                                        | <b><math>\text{NaMoO}_3(\text{IO}_3)(\text{H}_2\text{O})</math></b>                                               | <b>3.44</b>              | <b>0.231 @visible light<sup>exp</sup></b> |                              |

Table S4. The calculated dipole moments of anionic groups within a unit cell of NaMoO<sub>3</sub>(IO<sub>3</sub>)(H<sub>2</sub>O).

| Polar unit (a unit cell)                 | Symmetric operation | Dipole moment (D)                           |          |          |         |
|------------------------------------------|---------------------|---------------------------------------------|----------|----------|---------|
|                                          |                     | <i>x</i>                                    | <i>y</i> | <i>z</i> | total   |
| I(1)O <sub>3</sub>                       | x, y, z             | -2.7502                                     | -8.5311  | 13.1336  | 15.9008 |
| I(1)O <sub>3</sub>                       | x, 1-y, 0.5+z       | -2.7486                                     | 8.5315   | 13.1321  | 15.8994 |
| I(2)O <sub>3</sub>                       | x, 1-y, 0.5+z       | -0.0127                                     | 9.8102   | 14.1248  | 17.1974 |
| I(2)O <sub>3</sub>                       | x, y, z             | -0.0134                                     | -9.8106  | 14.1224  | 17.1956 |
| Net dipole moment (IO <sub>3</sub> )     |                     | -5.5249                                     | 0        | 54.5129  | 54.7921 |
| Mo(1)O <sub>6</sub>                      | x, 1-y, -0.5+z      | -3.6865                                     | -1.0223  | -0.9718  | 3.9471  |
| Mo(1)O <sub>6</sub>                      | x, y, z             | -3.6878                                     | 1.0207   | -0.9730  | 3.9482  |
| Mo(2)O <sub>6</sub>                      | x, -1+y, z          | 4.3588                                      | 1.4927   | 0.9377   | 4.7017  |
| Mo(2)O <sub>6</sub>                      | x, 1-y, 0.5+z       | 4.3580                                      | -1.4933  | 0.9390   | 4.7014  |
| Net dipole moment (MoO <sub>6</sub> )    |                     | 1.3424                                      | 0        | -0.0681  | 1.3442  |
| Net dipole moment                        |                     | -4.1825                                     | 0        | 54.4447  | 54.6052 |
| Cell volume (Å <sup>3</sup> )            |                     | 610.87 (9)                                  |          |          |         |
| Dipole moment density                    |                     | 54.6052 / 610.87 = 0.0893 D Å <sup>-3</sup> |          |          |         |
| Dipole moment density (IO <sub>3</sub> ) |                     | 54.7921 / 610.87 = 0.0897 D Å <sup>-3</sup> |          |          |         |

Table S5. Calculated SHG coefficients of NaMoO<sub>3</sub>(IO<sub>3</sub>)(H<sub>2</sub>O).

| SHG tensor components | Values (pm/V) | SHG tensor components | Values (pm/V) |
|-----------------------|---------------|-----------------------|---------------|
| $d_{111}$             | -0.24         | $d_{133}$             | -0.31         |
| $d_{112}$             | 0             | $d_{222}$             | 0             |
| $d_{113}$             | -0.89         | $d_{223}$             | -0.38         |
| $d_{122}$             | -0.32         | $d_{233}$             | 0             |
| $d_{123}$             | 0             | $d_{333}$             | -2.29         |

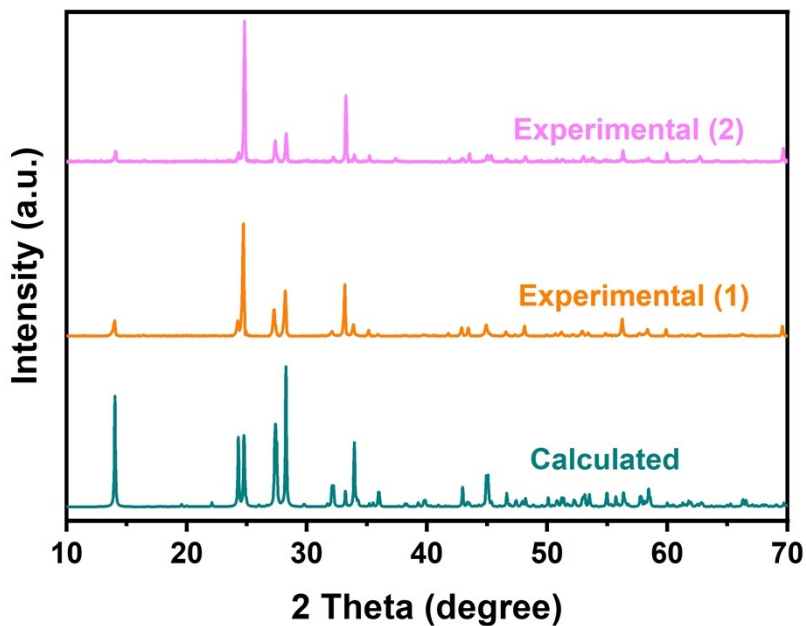

Figure S1. The calculated (Dark Cyan) and experimental (The colors orange and LT Magenta represent fresh samples and samples exposed to humid air for more than 3 months, respectively) powder X-ray diffraction patterns of  $\text{NaMoO}_3(\text{IO}_3)(\text{H}_2\text{O})$ .

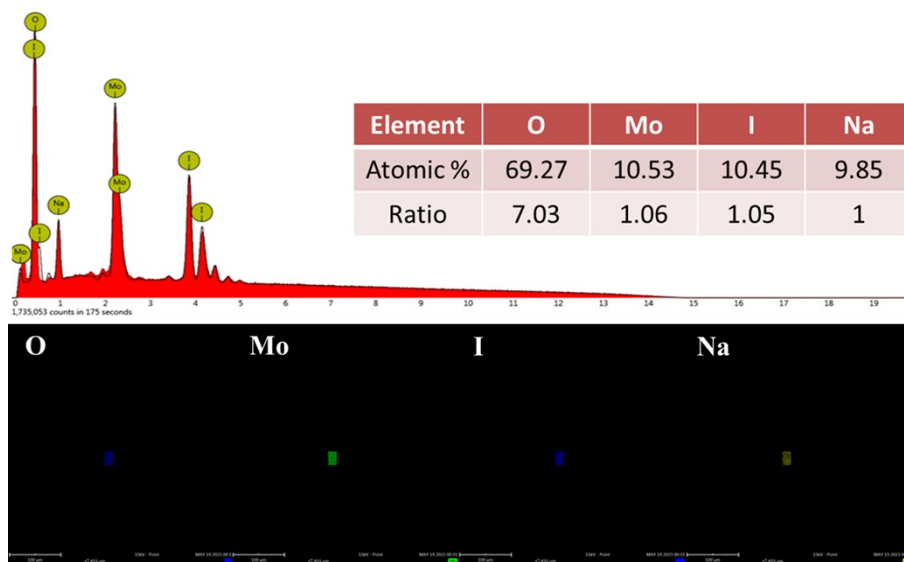

Figure S2. EDS analysis of  $\text{NaMoO}_3(\text{IO}_3)(\text{H}_2\text{O})$ .



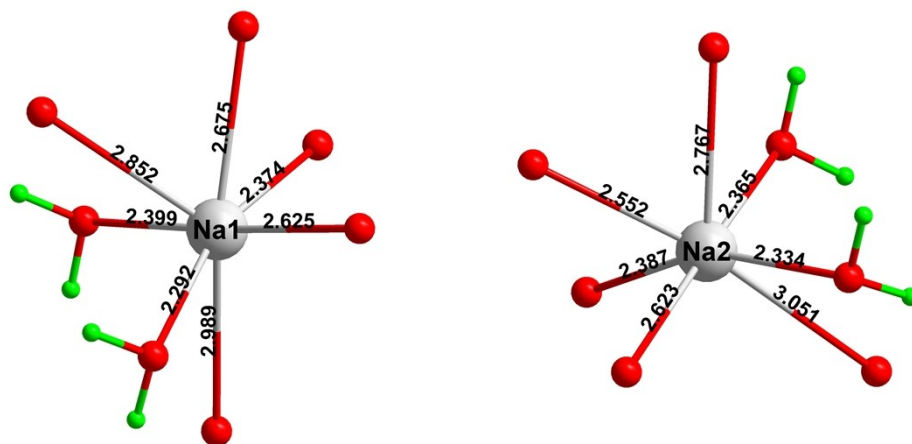

Figure S3. The coordination environment of Na atoms in the structure of  $\text{NaMoO}_3(\text{IO}_3)(\text{H}_2\text{O})$

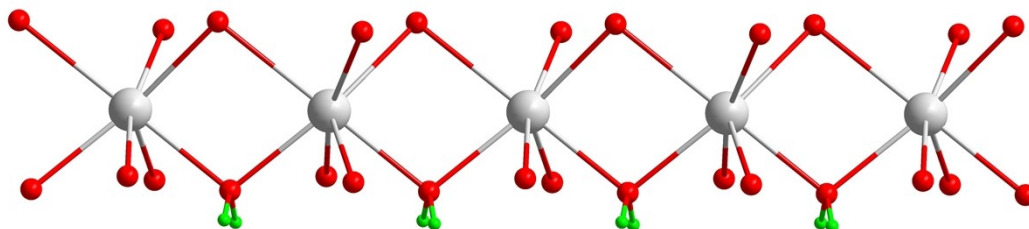

Figure S4. The Na-O line consisted by  $[\text{Na}(1)\text{O}_7]$  polyhedra.

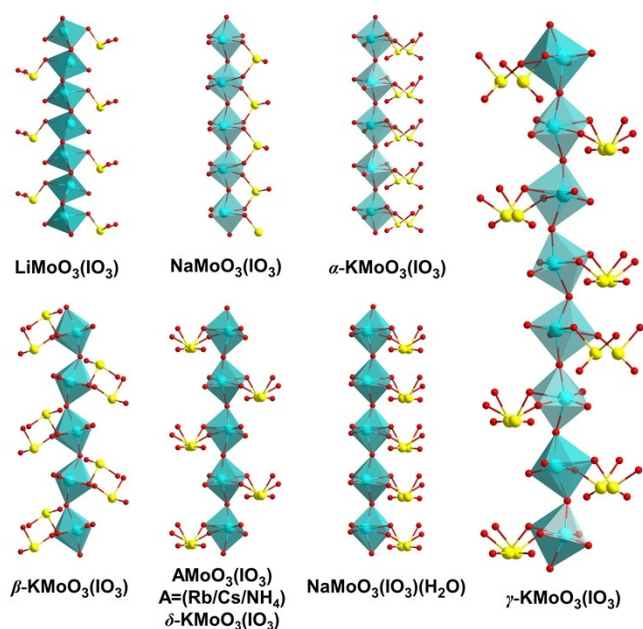

Figure S5. The connection mode of  $[\text{MoO}_6]$  octahedra and  $[\text{IO}_3]$  pyramids within the structures of  $\text{AMoO}_3(\text{IO}_3)$  ( $\text{A} = \text{NH}_4^+$  and alkali-metal ions) family.

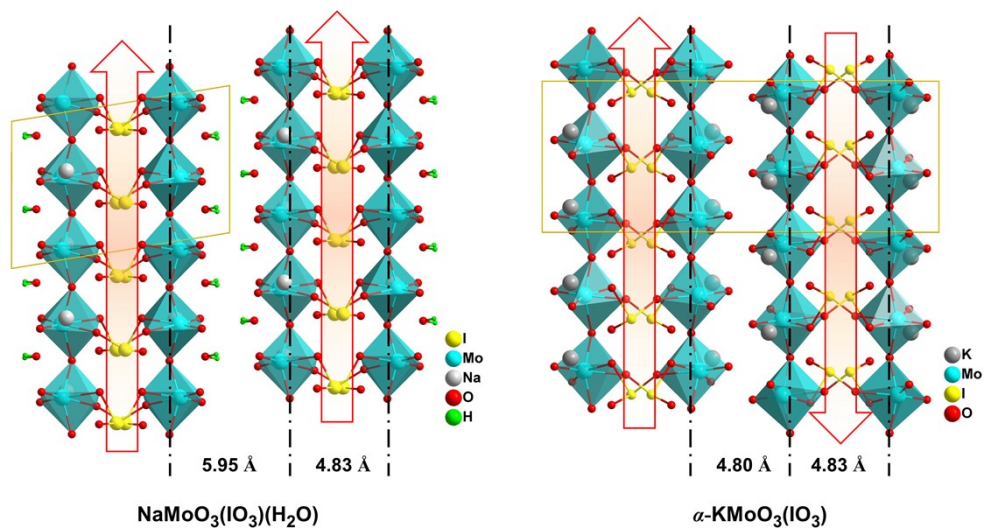

Figure S6. The comparison of layer orientation and distance within the structures of NaMoO<sub>3</sub>(IO<sub>3</sub>)(H<sub>2</sub>O) and *α*-KMoO<sub>3</sub>(IO<sub>3</sub>).

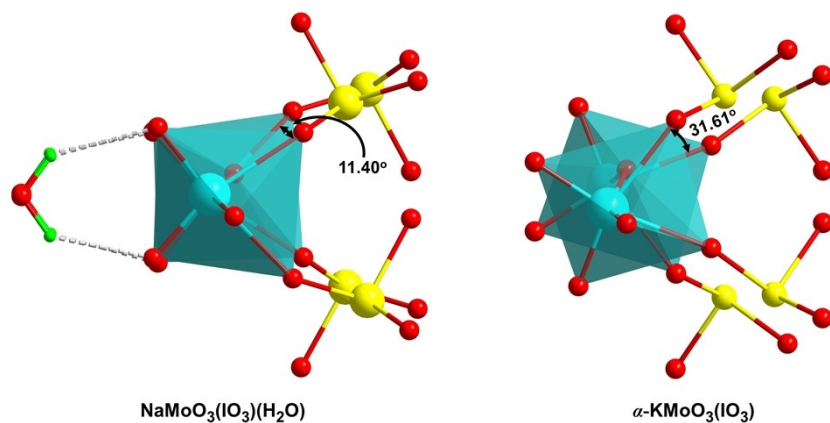

Figure S7. The degree of torsion for adjacent [MoO<sub>6</sub>] octahedron in Mo-O chain for NaMoO<sub>3</sub>(IO<sub>3</sub>)(H<sub>2</sub>O) and *α*-KMoO<sub>3</sub>(IO<sub>3</sub>).

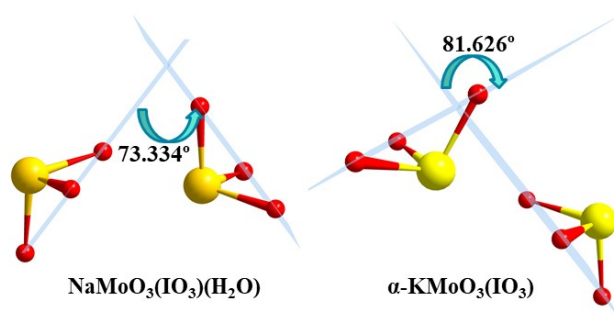

Figure S8. The different dihedral angle between two [IO<sub>3</sub>] groups in NaMoO<sub>3</sub>(IO<sub>3</sub>)(H<sub>2</sub>O) and *α*-KMoO<sub>3</sub>(IO<sub>3</sub>).

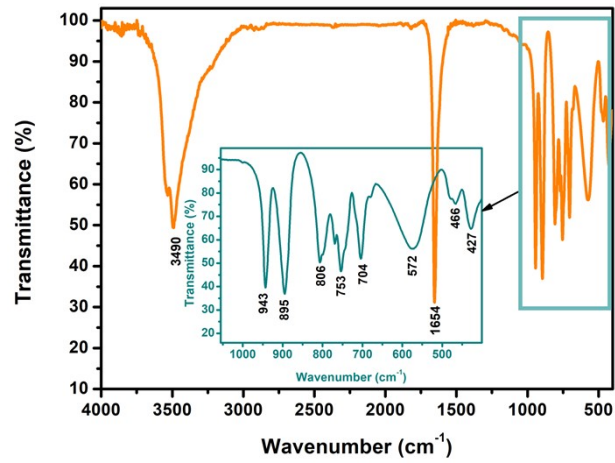

Figure S9. Infrared spectrum of  $\text{NaMoO}_3(\text{IO}_3)(\text{H}_2\text{O})$ .

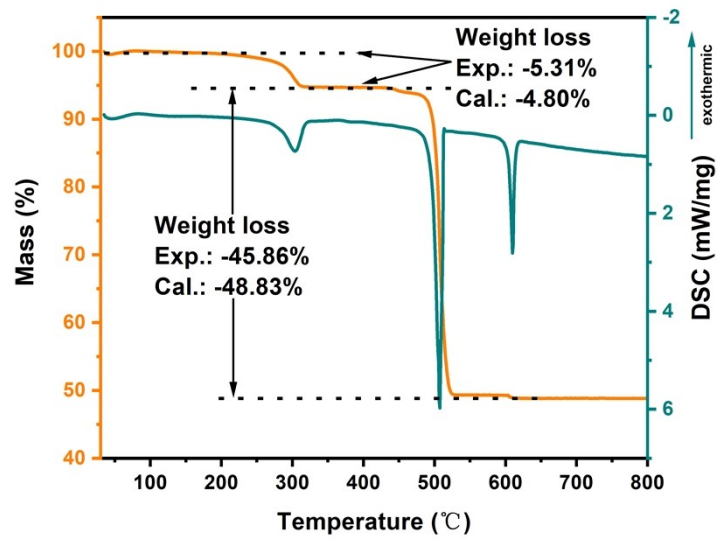

Figure S10. TG and DSC curves of  $\text{NaMoO}_3(\text{IO}_3)(\text{H}_2\text{O})$ .

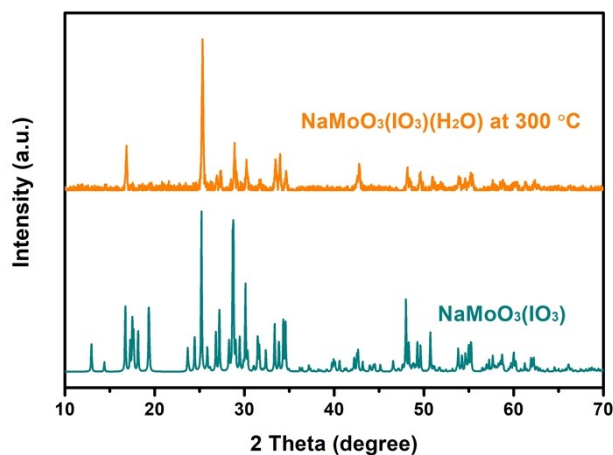

Figure S11. The powder X-ray diffraction patterns of the intermediate after calcination at 300 °C of  $\text{NaMoO}_3(\text{IO}_3)(\text{H}_2\text{O})$ .

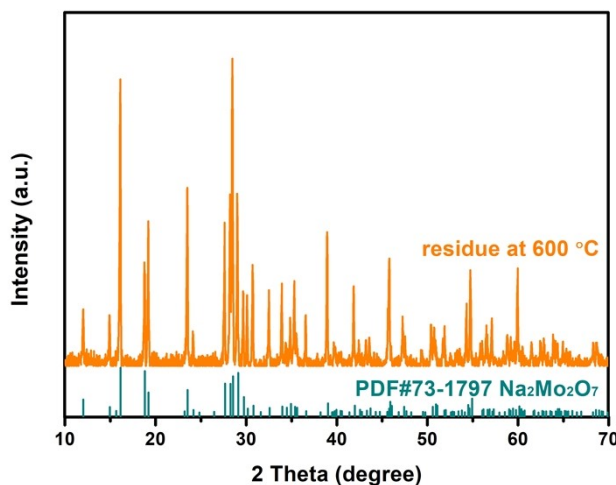

Figure S12. The powder X-ray diffraction patterns of the residue after calcination at 600 °C of  $\text{NaMoO}_3(\text{IO}_3)(\text{H}_2\text{O})$ .

## Notes and references

- 1 Y. Li, G. Han, H. Yu, H. Li, Z. Yang and S. Pan, Two polar molybdenum(VI) iodates(V) with large second-harmonic generation responses, *Chem. Mater.*, 2019, **31**, 2992-3000.
- 2 J. Chen, C. Hu, Y. Li, Q. Chen, B. Li and J. Mao,  $\text{AMoO}_3(\text{IO}_3)$  (A = Na and K): two promising optical materials via properly assembling the A-shaped basic building units, *J. Alloys Compd.*, 2022, **894**, 162547.
- 3 X. Chen, L. Zhang, X. Chang, H. Xue, H. Zang, W. Xiao, X. Song and H. Yan,  $\text{LiMoO}_3(\text{IO}_3)$ : a new molybdenyl iodate based on  $\text{WO}_3$ -type sheets with large SHG response, *J. Alloys Compd.*, 2007, **428**, 54-58.
- 4 Y. Hu, X. Jiang, C. Wu, Z. Huang, Z. Lin, M. G. Humphrey and C. Zhang,  $\text{A}_2\text{MoO}_2\text{F}_3(\text{IO}_2\text{F}_2)$  (A = Rb, Cs): strong nonlinear optical responses and enlarged band gaps through fluorine incorporation, *Chem. Mater.*, 2021, **33**,

- 5700-5708.
- 5 R. E. Sykora, K. M. Ok, P. S. Halasyamani and T. E. Albrecht-Schmitt, Structural modulation of molybdenyl iodate architectures by alkali metal cations in  $\text{AMoO}_3(\text{IO}_3)$  (A = K, Rb, Cs): a facile route to new polar materials with large SHG responses, *J. Am. Chem. Soc.*, 2002, **124**, 1951-1957.
  - 6 Q. Li, H. N. Liu, H. W. Yu, Z. G. Hu, J. Y. Wang, Y. C. Wu, and H. P. Wu, Alignment of  $\Lambda$ -shaped basic building units to construct one new  $\text{KMoO}_3(\text{IO}_3)$  polar polymorph, *Inorg. Chem.*, 2023, **62**, 3896-3903.
  - 7 G. Zhou, J. Xu, X. Chen, H. Zhong, S. Wang, K. Xu, P. Deng, F. Gan, P. Deng and F. Gan, Growth and spectrum of a novel birefringent  $\alpha$ - $\text{BaB}_2\text{O}_4$  crystal, *J. Cryst. Growth*, 1998, **191**, 517-519.
  - 8 H. T. Luo, T. Tkaczyk, E. L. Dereniak, K. Oka and R. Sampson, High birefringence of the yttrium vanadate crystal in the middle wavelength infrared, *Opt. Lett.*, 2006, **31**, 616-618.
  - 9 G. Ghosh, Dispersion-equation coefficients for the refractive index and birefringence of calcite and quartz crystals, *Opt. Commun.*, 1999, **163**, 95-102.
  - 10 D. Wang, X. Zhang, P. Gong, Z. Lin, Z. Hu and Y. Wu,  $\epsilon$ - $\text{La}(\text{IO}_3)_3$ : a polar iodate with high thermal stability and a large second-harmonic-generation response obtained by a supercritical hydrothermal method, *Inorg. Chem.*, 2023, **62**, 6565-6569.
  - 11 J. Chen, P. Yang, H. Yu, Z. Hu, J. Wang, Y. Wu and H. Wu, Designing a strong second-harmonic generation polar iodate by the structure-directing properties of the “Tumbler-like”  $[\text{Zn}(\text{IO}_3)(\text{I}_2\text{O}_5(\text{OH}))]$  polyanions, *ACS Mater. Lett.*, 2023, 1665-1671.
  - 12 T. Wu, X. Jiang, C. Wu, H. Sha, Z. Wang, Z. Lin, Z. Huang, X. Long, M. G. Humphrey and C. Zhang, From  $\text{Ce}(\text{IO}_3)_4$  to  $\text{CeF}_2(\text{IO}_3)_2$ : fluorinated homovalent substitution simultaneously enhances SHG response and bandgap for mid-infrared nonlinear optics, *J. Mater. Chem. C*, 2021, **9**, 8987-8993.
